# Supplementary material for: Effects of Eimeria tenella infection on chicken caecal microbiome diversity, exploring variation associated with severity of pathology
Source: PLoS One. 2017 Sep 21;12(9):e0184890. doi: 10.1371/journal.pone.0184890 (PMC5608234; doi:10.1371/journal.pone.0184890)
Supplement: S5 Table — (XLSX) [file pone.0184890.s007.xlsx]

## Sheet: S5_Table
S5 Table. Differentially abundant OTUs between uninfected samples and all infected samples.
Following classification using Greengenes (GG) database, EzBioCloud was used to further classify OTUs, species are defined by a similarity value of ≥98.65%. Accession number indicates a unique identifier for each hit.
*More than one hit and accession number indicates EzBioCloud was unable to differentiate between closely related bacterial types.
OTU ID (GG)	DeSeq2 (Padj < 0.05)		Blast against Greengenes database (Qiime)							EzBioCloud classification
	log2FoldChange	padj	Kingdom	Phylum	Class	Order	Family	Genus	Species	Hit*	Accession*	Similarity(%)
173333	-7.07657	4.35e-18	Bacteria	Firmicutes	Bacilli	Bacillales	Staphylococcaceae	Staphylococcus	sciuri	Staphylococcus lentus	D83370	99.35
995960	-6.3319	3.28e-14	Bacteria	Actinobacteria	Actinobacteria	Actinomycetales	Dermabacteraceae	Brachybacterium	conglomeratum	Brachybacterium faecium or Brachybacterium paraconglomeratum	CP001643 & AJ415377	99.33
807874	-4.87284	3.16e-09	Bacteria	Firmicutes	Bacilli	Bacillales	Staphylococcaceae	Jeotgalicoccus	NA	Bacteria;;;Firmicutes;;Bacilli;;Bacillales;;Staphylococcaceae;;Jeotgalicoccus;GQ175333_s;;GQ175333	GQ175333	99.13
970318	-4.68016	1.04e-08	Bacteria	Firmicutes	Bacilli	Bacillales	Staphylococcaceae	Jeotgalicoccus	NA	Bacteria;;;Firmicutes;;Bacilli;;Bacillales;;Staphylococcaceae;;Jeotgalicoccus;GQ175333_s;;GQ175333	GQ175333	98.92
797229	2.22089	7.87e-07	Bacteria	Proteobacteria	Gammaproteobacteria	Enterobacteriales	Enterobacteriaceae	NA	NA	Escherichia coli, Escherichia fergusonii, Shigella flexneri & Shigella sonnei	LN831047, CU928158, CELV01000010, AB273732	99.14
3829957	2.81103	5.67e-06	Bacteria	Proteobacteria	Gammaproteobacteria	Enterobacteriales	Enterobacteriaceae	NA	NA	Escherichia coli, Escherichia fergusonii, Shigella flexneri & Shigella sonnei	LN831047, CU928158, CELV01000010, AB273732	99.14
782953	1.8046	6.5e-05	Bacteria	Proteobacteria	Gammaproteobacteria	Enterobacteriales	Enterobacteriaceae	NA	NA	Escherichia coli, Escherichia fergusonii, Shigella flexneri & Shigella sonnei	LN831047, CU928158, CELV01000010, AB273732	99.14
157704	2.28524	0.000169514	Bacteria	Firmicutes	Clostridia	Clostridiales	NA	NA	NA	Bacteria;;;Firmicutes;;Clostridia;;Clostridiales;;Lachnospiraceae;;Clostridium_g7;DQ455825_s;;DQ455825	DQ455825	99.32
4111715	2.0588	0.00175548	Bacteria	Proteobacteria	Gammaproteobacteria	Enterobacteriales	Enterobacteriaceae	NA	NA	Escherichia coli, Escherichia fergusonii, Shigella flexneri & Shigella sonnei	LN831047, CU928158, CELV01000010, AB273732	99.57
156357	2.87557	0.00175975	Bacteria	Firmicutes	Clostridia	Clostridiales	Lachnospiraceae	Clostridium	NA	Clostridium colinum	X76748	97.97
1111294	1.78811	0.00175975	Bacteria	Proteobacteria	Gammaproteobacteria	Enterobacteriales	Enterobacteriaceae	NA	NA	Escherichia coli, Escherichia fergusonii, Shigella flexneri & Shigella sonnei	LN831047, CU928158, CELV01000010, AB273732	99.14
761968	2.4752	0.00205739	Bacteria	Firmicutes	Clostridia	Clostridiales	NA	NA	NA	Bacteria;;;Firmicutes;;Clostridia;;Clostridiales;;Lachnospiraceae;;Blautia;DQ057463_s;;DQ057463	DQ057463	97.95
967275	3.63419	0.00244257	Bacteria	Proteobacteria	Gammaproteobacteria	Xanthomonadales	Xanthomonadaceae	Stenotrophomonas	NA	Pseudomonas geniculata	AB021404	99.57
914235	-4.78277	0.00244257	Bacteria	Actinobacteria	Actinobacteria	Actinomycetales	Brevibacteriaceae	Brevibacterium	NA	Brevibacterium iodinum, sediminis, epidermidis, celere, sanuinis, siliguriense	X76567, KX356313, BCSJ01000023, AY228463, AJ564859, AM937247	99.55
1104963	4.7645	0.00244257	Bacteria	Firmicutes	Clostridia	Clostridiales	Clostridiaceae	NA	NA	Clostridium paraputrificum	X73445	98.63
336703	-3.77244	0.00319803	Bacteria	Firmicutes	Bacilli	Bacillales	Staphylococcaceae	Jeotgalicoccus	NA	Jeotgalicoccus aerolatus, halophilus, nanhaiensis	GU295939, FJ386517, FJ237390	99.57
311961	1.59575	0.0048364	Bacteria	Firmicutes	Clostridia	Clostridiales	Ruminococcaceae	Anaerotruncus	NA	Anaerotruncus colihominis	ABGD02000032	99.32
4333897	1.76979	0.00894303	Bacteria	Proteobacteria	Gammaproteobacteria	Enterobacteriales	Enterobacteriaceae	NA	NA	Escherichia coli, Escherichia fergusonii, Shigella flexneri & Shigella sonnei	LN831047, CU928158, CELV01000010, AB273732	99.35
2689396	1.77493	0.00894303	Bacteria	Proteobacteria	Gammaproteobacteria	Enterobacteriales	Enterobacteriaceae	NA	NA	Escherichia coli, Escherichia fergusonii, Shigella flexneri & Shigella sonnei	LN831047, CU928158, CELV01000010, AB273732	99.35
422727	1.9257	0.00915065	Bacteria	Firmicutes	Clostridia	Clostridiales	NA	NA	NA	Bacteria;;;Firmicutes;;Clostridia;;Clostridiales;;Lachnospiraceae;;Clostridium_g7;DQ455825_s;;DQ455825	DQ455825	99.32
588216	1.45	0.00915065	Bacteria	Proteobacteria	Gammaproteobacteria	Enterobacteriales	Enterobacteriaceae	NA	NA	Escherichia coli, Escherichia fergusonii, Shigella flexneri & Shigella sonnei	LN831047, CU928158, CELV01000010, AB273732	98.92
1104638	2.50561	0.0147939	Bacteria	Proteobacteria	Gammaproteobacteria	Enterobacteriales	Enterobacteriaceae	NA	NA	Escherichia coli, Escherichia fergusonii, Shigella flexneri & Shigella sonnei	LN831047, CU928158, CELV01000010, AB273732	99.35
173654	1.91047	0.0147939	Bacteria	Proteobacteria	Gammaproteobacteria	Enterobacteriales	Enterobacteriaceae	NA	NA	Escherichia coli, Escherichia fergusonii, Shigella flexneri & Shigella sonnei	LN831047, CU928158, CELV01000010, AB273732	98.92
650615	-2.60404	0.0208621	Bacteria	Actinobacteria	Actinobacteria	Actinomycetales	Corynebacteriaceae	Corynebacterium	NA	Corynebacterium stationis	CP009251	99.56
292289	2.47733	0.0234789	Bacteria	Proteobacteria	Gammaproteobacteria	Enterobacteriales	Enterobacteriaceae	NA	NA	Escherichia coli, Escherichia fergusonii, Shigella flexneri & Shigella sonnei	LN831047, CU928158, CELV01000010, AB273732	98.49
570049	-1.64474	0.0310891	Bacteria	Firmicutes	Clostridia	Clostridiales	Lachnospiraceae	NA	NA	Bacteria;Firmicutes;Clostridia;Clostridiales;Lachnospiraceae;EF025278_g	EF025278	98.86
532235	-1.21733	0.0348481	Bacteria	Firmicutes	Clostridia	Clostridiales	NA	NA	NA	Bacteria;Firmicutes;Clostridia;Clostridiales;Lachnospiraceae;EF025278_g	EF025278	99.32
772384	-1.4486	0.0375212	Bacteria	Firmicutes	Clostridia	Clostridiales	Lachnospiraceae	NA	NA	Bacteria;Firmicutes;Clostridia;Clostridiales;Lachnospiraceae;EF025278_g	EF025278	99.32
211212	3.50641	0.0378407	Bacteria	Firmicutes	Clostridia	Clostridiales	Lachnospiraceae	NA	NA	Bacteria;;;Firmicutes;;Clostridia;;Clostridiales;;Lachnospiraceae;;AJ518873_g;EF405506_s;;EF405506	EF405506	99.32
555945	-1.95842	0.0378407	Bacteria	Firmicutes	Clostridia	Clostridiales	Peptostreptococcaceae	NA	NA	Bacteria;;;Firmicutes;;Clostridia;;Clostridiales;;Peptostreptococcaceae;;Romboutsia;HQ768009_s;;HQ768009	HQ768009	99.32
553352	2.34344	0.0378407	Bacteria	Firmicutes	Bacilli	Lactobacillales	Lactobacillaceae	Lactobacillus	NA	Lactobacillus johnsonii	ACGR01000047	98.92
323862	-1.20228	0.0378407	Bacteria	Firmicutes	Clostridia	Clostridiales	Lachnospiraceae	NA	NA	Bacteria;;;Firmicutes;;Clostridia;;Clostridiales;;Lachnospiraceae;;AJ518873_g;EF405506_s;;EF405506	EF405506	98.86
304641	1.97439	0.0388956	Bacteria	Proteobacteria	Gammaproteobacteria	Enterobacteriales	Enterobacteriaceae	NA	NA	Escherichia coli, Escherichia fergusonii, Shigella flexneri & Shigella sonnei	LN831047, CU928158, CELV01000010, AB273732	99.14
1663575	2.3804	0.0394251	Bacteria	Proteobacteria	Gammaproteobacteria	Enterobacteriales	Enterobacteriaceae	NA	NA	Escherichia coli, Escherichia fergusonii, Shigella flexneri & Shigella sonnei	LN831047, CU928158, CELV01000010, AB273732	99.35
1088265	3.2369	0.0394251	Bacteria	Actinobacteria	Actinobacteria	Actinomycetales	Propionibacteriaceae	Propionibacterium	acnes	Cutibacterium acnes	AWZZ01000008	99.33
4426298	2.53637	0.0484828	Bacteria	Actinobacteria	Actinobacteria	Bifidobacteriales	Bifidobacteriaceae	Bifidobacterium	NA	Bifidobacterium animalis subsp. Lactis	CP001606	99.34
581782	2.38902	0.0490423	Bacteria	Proteobacteria	Gammaproteobacteria	Enterobacteriales	Enterobacteriaceae	NA	NA	Escherichia coli, Escherichia fergusonii, Shigella flexneri & Shigella sonnei	LN831047, CU928158, CELV01000010, AB273732	98.92
