# Supplementary material for: Effects of Eimeria tenella infection on chicken caecal microbiome diversity, exploring variation associated with severity of pathology
Source: PLoS One. 2017 Sep 21;12(9):e0184890. doi: 10.1371/journal.pone.0184890 (PMC5608234; doi:10.1371/journal.pone.0184890)
Supplement: S6 Table — (XLSX) [file pone.0184890.s008.xlsx]

## Sheet: S6_Table
S6 Table. Differentially abundant OTUs between uninfected samples and lesion score 0 samples.
Following classification using Greengenes (GG) database, EzBioCloud was used to further classify OTUs, species are defined by a similarity value of ≥98.65%. Accession number indicates a unique identifier for each hit.
*More than one hit and accession number indicates EzBioCloud was unable to differentiate between closely related bacterial types.
OTU ID (GG)	DeSeq2 (Padj < 0.05)		Blast against Greengenes database (Qiime)							EzBioCloud classification
	log2 Fold Change	padj	Kingdom	Phylum	Class	Order	Family	Genus	Species	Hit*	Accession*	Similarity(%)
173333	-6.17356	1.47836e-13	Bacteria	Firmicutes	Bacilli	Bacillales	Staphylococcaceae	Staphylococcus	sciuri	Staphylococcus lentus	D83370	99.35
513445	-9.70128	7.47853e-10	Bacteria	Bacteroidetes	Bacteroidia	Bacteroidales	Bacteroidaceae	Bacteroides	NA	Bacteroides vulgatus	CP000139	99.13
995960	-5.57056	2.60091e-08	Bacteria	Actinobacteria	Actinobacteria	Actinomycetales	Dermabacteraceae	Brachybacterium	conglomeratum	Brachybacterium faecium or Brachybacterium paraconglomeratum	CP001643 & AJ415377	99.33
970318	-3.9609	3.24997e-05	Bacteria	Firmicutes	Bacilli	Bacillales	Staphylococcaceae	Jeotgalicoccus	NA	Bacteria;;;Firmicutes;;Bacilli;;Bacillales;;Staphylococcaceae;;Jeotgalicoccus;GQ175333_s;;GQ175333	GQ175333	98.92
807874	-4.09479	4.03584e-05	Bacteria	Firmicutes	Bacilli	Bacillales	Staphylococcaceae	Jeotgalicoccus	NA	Bacteria;;;Firmicutes;;Bacilli;;Bacillales;;Staphylococcaceae;;Jeotgalicoccus;GQ175333_s;;GQ175333	GQ175333	99.13
553352	3.75229	0.00107375	Bacteria	Firmicutes	Bacilli	Lactobacillales	Lactobacillaceae	Lactobacillus	NA	Lactobacillus johnsonii	ACGR01000047	98.92
581474	3.46337	0.00107375	Bacteria	Firmicutes	Bacilli	Lactobacillales	Lactobacillaceae	Lactobacillus	NA	Lactobacillus johnsonii	ACGR01000047	99.57
364029	-6.54502	0.00164097	Bacteria	Bacteroidetes	Bacteroidia	Bacteroidales	Bacteroidaceae	Bacteroides	NA	Bacteroides vulgatus	CP000139	98.91
577170	-6.17184	0.00241796	Bacteria	Bacteroidetes	Bacteroidia	Bacteroidales	Bacteroidaceae	Bacteroides	NA	Bacteroides dorei	ABWZ01000093	97.83
914235	-5.34487	0.00241796	Bacteria	Actinobacteria	Actinobacteria	Actinomycetales	Brevibacteriaceae	Brevibacterium	NA	Brevibacterium iodinum, sediminis, epidermidis, celere, sanuinis, siliguriense	X76567, KX356313, BCSJ01000023, AY228463, AJ564859, AM937247	99.55
4426298	3.62285	0.00273436	Bacteria	Actinobacteria	Actinobacteria	Bifidobacteriales	Bifidobacteriaceae	Bifidobacterium	NA	Bifidobacterium animalis subsp. lactis	CP001606	99.34
797229	1.71322	0.0061104	Bacteria	Proteobacteria	Gammaproteobacteria	Enterobacteriales	Enterobacteriaceae	NA	NA	Escherichia coli, Escherichia fergusonii, Shigella flexneri & Shigella sonnei	LN831047, CU928158, CELV01000010, AB273732	99.14
157327	-5.82481	0.0123296	Bacteria	Bacteroidetes	Bacteroidia	Bacteroidales	Bacteroidaceae	Bacteroides	NA	Bacteroides vulgatus	CP000139	99.13
3829957	1.86508	0.0159399	Bacteria	Proteobacteria	Gammaproteobacteria	Enterobacteriales	Enterobacteriaceae	NA	NA	Escherichia coli, Escherichia fergusonii, Shigella flexneri & Shigella sonnei	LN831047, CU928158, CELV01000010, AB273732	99.14
211212	4.6221	0.0163965	Bacteria	Firmicutes	Clostridia	Clostridiales	Lachnospiraceae	NA	NA	Bacteria;;;Firmicutes;;Clostridia;;Clostridiales;;Lachnospiraceae;;AJ518873_g;EF405506_s;;EF405506	EF405506	99.32
156357	3.43474	0.0183948	Bacteria	Firmicutes	Clostridia	Clostridiales	Lachnospiraceae	Clostridium	NA	Clostridium colinum	X76748	97.97
588471	-2.81903	0.0193605	Bacteria	Verrucomicrobia	Verrucomicrobiae	Verrucomicrobiales	Verrucomicrobiaceae	Akkermansia	muciniphila	Akkermansia muciniphila	CP001071	99.55
273232	-3.00855	0.0197966	Bacteria	Verrucomicrobia	Verrucomicrobiae	Verrucomicrobiales	Verrucomicrobiaceae	Akkermansia	muciniphila	Akkermansia muciniphila	CP001071	97.08
336632	-2.68938	0.0197966	Bacteria	Verrucomicrobia	Verrucomicrobiae	Verrucomicrobiales	Verrucomicrobiaceae	Akkermansia	muciniphila	Akkermansia muciniphila	CP001071	99.78
348304	-4.53947	0.0197966	Bacteria	Bacteroidetes	Bacteroidia	Bacteroidales	Bacteroidaceae	Bacteroides	NA	Bacteroides dorei	ABWZ01000093	99.35
650615	-2.64687	0.0197966	Bacteria	Actinobacteria	Actinobacteria	Actinomycetales	Corynebacteriaceae	Corynebacterium	NA	Corynebacterium stationis	CP009251	99.56
354905		0.0232504	Bacteria	Firmicutes	Bacilli	Lactobacillales	Lactobacillaceae	Lactobacillus	NA	Lactobacillus johnsonii	ACGR01000047	98.49
782953	1.36454	0.0290203	Bacteria	Proteobacteria	Gammaproteobacteria	Enterobacteriales	Enterobacteriaceae	NA	NA	Escherichia coli, Escherichia fergusonii, Shigella flexneri & Shigella sonnei	LN831047, CU928158, CELV01000010, AB273732	99.35
4455163	-4.4987	0.044596	Bacteria	Bacteroidetes	Bacteroidia	Bacteroidales	Bacteroidaceae	Bacteroides	NA	Bacteroides vulgatus	CP000139	98.91
470879	2.28534	0.0450716	Bacteria	Proteobacteria	Gammaproteobacteria	Enterobacteriales	Enterobacteriaceae	Proteus	NA	Proteus mirabilis	ACLE01000013	99.14
768553	2.41231	0.0450716	Bacteria	Proteobacteria	Gammaproteobacteria	Enterobacteriales	Enterobacteriaceae	Proteus	NA	Proteus mirabilis	ACLE01000013	99.35
