# Supplementary material for: Effects of Eimeria tenella infection on chicken caecal microbiome diversity, exploring variation associated with severity of pathology
Source: PLoS One. 2017 Sep 21;12(9):e0184890. doi: 10.1371/journal.pone.0184890 (PMC5608234; doi:10.1371/journal.pone.0184890)
Supplement: S7 Table — (XLSX) [file pone.0184890.s009.xlsx]

## Sheet: S7_Table
S7 Table. Differentially abundant OTUs between uninfected samples and lesion score 1 samples.
Following classification using Greengenes (GG) database, EzBioCloud was used to further classify OTUs, species are defined by a similarity value of ≥98.65%. Accession number indicates a unique identifier for each hit.
*More than one hit and accession number indicates EzBioCloud was unable to differentiate between closely related bacterial types.
OTU ID (GG)	DeSeq2 (Padj < 0.05)		Blast against Greengenes database (Qiime)							EzBioCloud classification
	log2 Fold Change	padj	Kingdom	Phylum	Class	Order	Family	Genus	Species	Hit*	Accession*	Similarity(%)
173333	-7.20835	1.98669e-15	Bacteria	Firmicutes	Bacilli	Bacillales	Staphylococcaceae	Staphylococcus	sciuri	Staphylococcus lentus	D83370	99.35
995960	-6.58639	1.44306e-14	Bacteria	Actinobacteria	Actinobacteria	Actinomycetales	Dermabacteraceae	Brachybacterium	conglomeratum	Brachybacterium faecium or Brachybacterium paraconglomeratum	CP001643 & AJ415377	99.33
3829957	2.63803	4.11189e-05	Bacteria	Proteobacteria	Gammaproteobacteria	Enterobacteriales	Enterobacteriaceae	NA	NA	Escherichia coli, Escherichia fergusonii, Shigella flexneri & Shigella sonnei	LN831047, CU928158, CELV01000010, AB273732	99.14
797229	2.47228	5.33313e-05	Bacteria	Proteobacteria	Gammaproteobacteria	Enterobacteriales	Enterobacteriaceae	NA	NA	Escherichia coli, Escherichia fergusonii, Shigella flexneri & Shigella sonnei	LN831047, CU928158, CELV01000010, AB273732	99.14
807874	-3.87119	0.00010419	Bacteria	Firmicutes	Bacilli	Bacillales	Staphylococcaceae	Jeotgalicoccus	NA	Bacteria;;;Firmicutes;;Bacilli;;Bacillales;;Staphylococcaceae;;Jeotgalicoccus;GQ175333_s;;GQ175333	GQ175333	99.13
782953	1.87404	0.00157053	Bacteria	Proteobacteria	Gammaproteobacteria	Enterobacteriales	Enterobacteriaceae	NA	NA	Escherichia coli, Escherichia fergusonii, Shigella flexneri & Shigella sonnei	LN831047, CU928158, CELV01000010, AB273732	99.35
914235	-4.63146	0.00157053	Bacteria	Actinobacteria	Actinobacteria	Actinomycetales	Brevibacteriaceae	Brevibacterium	NA	Brevibacterium iodinum, sediminis, epidermidis, celere, sanuinis, siliguriense	X76567, KX356313, BCSJ01000023, AY228463, AJ564859, AM937247	99.55
970318	-3.33532	0.00182771	Bacteria	Firmicutes	Bacilli	Bacillales	Staphylococcaceae	Jeotgalicoccus	NA	Bacteria;;;Firmicutes;;Bacilli;;Bacillales;;Staphylococcaceae;;Jeotgalicoccus;GQ175333_s;;GQ175333	GQ175333	98.92
761968	2.82062	0.00255867	Bacteria	Firmicutes	Clostridia	Clostridiales	NA	NA	NA	Bacteria;;;Firmicutes;;Clostridia;;Clostridiales;;Lachnospiraceae;;Blautia;DQ057463_s;;DQ057463	DQ057463	97.95
650615	-2.93456	0.00284433	Bacteria	Actinobacteria	Actinobacteria	Actinomycetales	Corynebacteriaceae	Corynebacterium	NA	Corynebacterium stationis	CP009251	99.56
555945	-2.58973	0.00358624	Bacteria	Firmicutes	Clostridia	Clostridiales	Peptostreptococcaceae	NA	NA	Bacteria;;;Firmicutes;;Clostridia;;Clostridiales;;Peptostreptococcaceae;;Romboutsia;HQ768009_s;;HQ768009	HQ768009	99.32
588216	1.64159	0.00399557	Bacteria	Proteobacteria	Gammaproteobacteria	Enterobacteriales	Enterobacteriaceae	NA	NA	Escherichia coli, Escherichia fergusonii, Shigella flexneri & Shigella sonnei	LN831047, CU928158, CELV01000010, AB273732	98.92
157704	1.60392	0.00610973	Bacteria	Firmicutes	Clostridia	Clostridiales	NA	NA	NA	Bacteria;;;Firmicutes;;Clostridia;;Clostridiales;;Lachnospiraceae;;Clostridium_g7;DQ455825_s;;DQ455825	DQ455825	99.32
311961	1.81206	0.0123693	Bacteria	Firmicutes	Clostridia	Clostridiales	Ruminococcaceae	Anaerotruncus	NA	Anaerotruncus colihominis	ABGD02000032	99.32
173654	2.13967	0.0123693	Bacteria	Proteobacteria	Gammaproteobacteria	Enterobacteriales	Enterobacteriaceae	NA	NA	Escherichia coli, Escherichia fergusonii, Shigella flexneri & Shigella sonnei	LN831047, CU928158, CELV01000010, AB273732	99.14
4333897	2.0885	0.0123693	Bacteria	Proteobacteria	Gammaproteobacteria	Enterobacteriales	Enterobacteriaceae	NA	NA	Escherichia coli, Escherichia fergusonii, Shigella flexneri & Shigella sonnei	LN831047, CU928158, CELV01000010, AB273732	99.35
712677	-3.06401	0.0163742	Bacteria	Firmicutes	Clostridia	Clostridiales	Clostridiaceae	SMB53	NA	Bacteria;;;Firmicutes;;Clostridia;;Clostridiales;;Peptostreptococcaceae;;Romboutsia;HQ768009_s;;HQ768009	HQ768009	99.32
2689396	1.885	0.0163742	Bacteria	Proteobacteria	Gammaproteobacteria	Enterobacteriales	Enterobacteriaceae	NA	NA	Escherichia coli, Escherichia fergusonii, Shigella flexneri & Shigella sonnei	LN831047, CU928158, CELV01000010, AB273732	99.35
2136916	-3.82966	0.0290754	Bacteria	Lentisphaerae	[Lentisphaeria]	Victivallales	Victivallaceae	NA	NA	Victivallis vadensis	ABDE02000010	99.32
4111715	2.04404	0.0310866	Bacteria	Proteobacteria	Gammaproteobacteria	Enterobacteriales	Enterobacteriaceae	NA	NA	Escherichia coli, Escherichia fergusonii, Shigella flexneri & Shigella sonnei	LN831047, CU928158, CELV01000010, AB273732	99.57
1111294		0.0310866	Bacteria	Proteobacteria	Gammaproteobacteria	Enterobacteriales	Enterobacteriaceae	NA	NA	Escherichia coli, Escherichia fergusonii, Shigella flexneri & Shigella sonnei	LN831047, CU928158, CELV01000010, AB273732	99.14
336703	-2.80563	0.0310866	Bacteria	Firmicutes	Bacilli	Bacillales	Staphylococcaceae	Jeotgalicoccus	NA	Jeotgalicoccus aerolatus, halophilus, nanhaiensis	GU295939, FJ386517, FJ237390	99.57
1663575	2.7365	0.0370811	Bacteria	Proteobacteria	Gammaproteobacteria	Enterobacteriales	Enterobacteriaceae	NA	NA	Escherichia coli, Escherichia fergusonii, Shigella flexneri & Shigella sonnei	LN831047, CU928158, CELV01000010, AB273732	99.35
