# Supplementary material for: Effects of Eimeria tenella infection on chicken caecal microbiome diversity, exploring variation associated with severity of pathology
Source: PLoS One. 2017 Sep 21;12(9):e0184890. doi: 10.1371/journal.pone.0184890 (PMC5608234; doi:10.1371/journal.pone.0184890)
Supplement: S8 Table — (XLSX) [file pone.0184890.s010.xlsx]

## Sheet: S8_Table
S8 Table. Differentially abundant OTUs between uninfected samples and lesion score 2 samples.
Following classification using Greengenes (GG) database, EzBioCloud was used to further classify OTUs, species are defined by a similarity value of ≥98.65%. Accession number indicates a unique identifier for each hit.
*More than one hit and accession number indicates EzBioCloud was unable to differentiate between closely related bacterial types.
OTU ID (GG)	DeSeq2 (Padj < 0.05)		Blast against Greengenes database (Qiime)							EzBioCloud classification
	log2 Fold Change	padj	Kingdom	Phylum	Class	Order	Family	Genus	Species	Hit*	Accession*	Similarity(%)
173333	-7.95228	4.19551e-18	Bacteria	Firmicutes	Bacilli	Bacillales	Staphylococcaceae	Staphylococcus	sciuri	Staphylococcus lentus	D83370	99.35
995960	-7.14971	8.18668e-15	Bacteria	Actinobacteria	Actinobacteria	Actinomycetales	Dermabacteraceae	Brachybacterium	conglomeratum	Brachybacterium faecium or Brachybacterium paraconglomeratum	CP001643 & AJ415377	99.33
970318	-4.91685	5.43609e-07	Bacteria	Firmicutes	Bacilli	Bacillales	Staphylococcaceae	Jeotgalicoccus	NA	Bacteria;;;Firmicutes;;Bacilli;;Bacillales;;Staphylococcaceae;;Jeotgalicoccus;GQ175333_s;;GQ175333	GQ175333	98.92
807874	-4.67624	1.35259e-06	Bacteria	Firmicutes	Bacilli	Bacillales	Staphylococcaceae	Jeotgalicoccus	NA	Bacteria;;;Firmicutes;;Bacilli;;Bacillales;;Staphylococcaceae;;Jeotgalicoccus;GQ175333_s;;GQ175333	GQ175333	99.13
797229	2.13665	4.84585e-05	Bacteria	Proteobacteria	Gammaproteobacteria	Enterobacteriales	Enterobacteriaceae	NA	NA	Escherichia coli, Escherichia fergusonii, Shigella flexneri & Shigella sonnei	LN831047, CU928158, CELV01000010, AB273732	99.14
914235	-5.11044	0.00168354	Bacteria	Actinobacteria	Actinobacteria	Actinomycetales	Brevibacteriaceae	Brevibacterium	NA	Brevibacterium iodinum, sediminis, epidermidis, celere, sanuinis, siliguriense	X76567, KX356313, BCSJ01000023, AY228463, AJ564859, AM937247	99.55
2136916	-5.3207	0.00659934	Bacteria	Lentisphaerae	[Lentisphaeria]	Victivallales	Victivallaceae	NA	NA	Victivallis vadensis	ABDE02000010	99.32
323862	-1.75349	0.00659934	Bacteria	Firmicutes	Clostridia	Clostridiales	Lachnospiraceae	NA	NA	Bacteria;;;Firmicutes;;Clostridia;;Clostridiales;;Lachnospiraceae;;EF025278_g;EF025278_s;;EF025278	EF025278	98.86
782953	1.53828	0.00706505	Bacteria	Proteobacteria	Gammaproteobacteria	Enterobacteriales	Enterobacteriaceae	NA	NA	Escherichia coli, Escherichia fergusonii, Shigella flexneri & Shigella sonnei	LN831047, CU928158, CELV01000010, AB273732	99.35
650615	-2.66332	0.00763472	Bacteria	Actinobacteria	Actinobacteria	Actinomycetales	Corynebacteriaceae	Corynebacterium	NA	Corynebacterium stationis	CP009251	99.56
532235	-1.745	0.00763472	Bacteria	Firmicutes	Clostridia	Clostridiales	NA	NA	NA	Bacteria;;;Firmicutes;;Clostridia;;Clostridiales;;Lachnospiraceae;;EF025278_g;EF025278_s;;EF025278	EF025278	99.32
336703	-3.23715	0.0131452	Bacteria	Firmicutes	Bacilli	Bacillales	Staphylococcaceae	Jeotgalicoccus	NA	Jeotgalicoccus aerolatus, halophilus, nanhaiensis	GU295939, FJ386517, FJ237390	99.57
4111715	2.21354	0.0192676	Bacteria	Proteobacteria	Gammaproteobacteria	Enterobacteriales	Enterobacteriaceae	NA	NA	Escherichia coli, Escherichia fergusonii, Shigella flexneri & Shigella sonnei	LN831047, CU928158, CELV01000010, AB273732	99.57
503354	-2.86557	0.0373539	Bacteria	Firmicutes	Bacilli	Bacillales	Planococcaceae	NA	NA	Staphylococcus arlettae	AB009933	99.35
4333897	1.76447	0.0430781	Bacteria	Proteobacteria	Gammaproteobacteria	Enterobacteriales	Enterobacteriaceae	NA	NA	Escherichia coli, Escherichia fergusonii, Shigella flexneri & Shigella sonnei	LN831047, CU928158, CELV01000010, AB273732	99.35
156357	3.00197	0.0471189	Bacteria	Firmicutes	Clostridia	Clostridiales	Lachnospiraceae	Clostridium	NA	Clostridium colinum	X76748	97.97
