# Supplementary material for: Effects of Eimeria tenella infection on chicken caecal microbiome diversity, exploring variation associated with severity of pathology
Source: PLoS One. 2017 Sep 21;12(9):e0184890. doi: 10.1371/journal.pone.0184890 (PMC5608234; doi:10.1371/journal.pone.0184890)
Supplement: S9 Table — (XLSX) [file pone.0184890.s011.xlsx]

## Sheet: S9_Table
S9 Table. Differentially abundant OTUs between uninfected samples and lesion score 3 samples.
Following classification using Greengenes (GG) database, EzBioCloud was used to further classify OTUs, species are defined by a similarity value of ≥98.65%. Accession number indicates a unique identifier for each hit.
*More than one hit and accession number indicates EzBioCloud was unable to differentiate between closely related bacterial types.
OTU ID (GG)	DeSeq2 (Padj < 0.05)		Blast against Greengenes database (Qiime)							EzBioCloud classification
	log2 Fold Change	padj	Kingdom	Phylum	Class	Order	Family	Genus	Species	Hit*	Accession*	Similarity(%)
173333	-8.09847	1.58179e-18	Bacteria	Firmicutes	Bacilli	Bacillales	Staphylococcaceae	Staphylococcus	sciuri	Staphylococcus lentus	D83370	99.35
807874	-6.41558	2.51864e-10	Bacteria	Firmicutes	Bacilli	Bacillales	Staphylococcaceae	Jeotgalicoccus	NA	Bacteria;;;Firmicutes;;Bacilli;;Bacillales;;Staphylococcaceae;;Jeotgalicoccus;GQ175333_s;;GQ175333	GQ175333	99.13
970318	-6.15591	1.27132e-09	Bacteria	Firmicutes	Bacilli	Bacillales	Staphylococcaceae	Jeotgalicoccus	NA	Bacteria;;;Firmicutes;;Bacilli;;Bacillales;;Staphylococcaceae;;Jeotgalicoccus;GQ175333_s;;GQ175333	GQ175333	98.92
995960	-6.10885	1.89736e-09	Bacteria	Actinobacteria	Actinobacteria	Actinomycetales	Dermabacteraceae	Brachybacterium	conglomeratum	Brachybacterium faecium or Brachybacterium paraconglomeratum	CP001643 & AJ415377	99.33
650615	-4.73812	1.96307e-06	Bacteria	Actinobacteria	Actinobacteria	Actinomycetales	Corynebacteriaceae	Corynebacterium	NA	Corynebacterium stationis	CP009251	99.56
3829957	3.45644	1.96015e-05	Bacteria	Proteobacteria	Gammaproteobacteria	Enterobacteriales	Enterobacteriaceae	NA	NA	Escherichia coli, Escherichia fergusonii, Shigella flexneri & Shigella sonnei	LN831047, CU928158, CELV01000010, AB273732	99.14
1084865	-3.51368	5.11061e-05	Bacteria	Firmicutes	Bacilli	Bacillales	NA	NA	NA	Staphylococcus xylosus	D83374	99.78
349024	-3.50493	0.00011509	Bacteria	Firmicutes	Bacilli	Lactobacillales	Streptococcaceae	Streptococcus	NA	Streptococcus gallolyticus: subsp. Macedonicus, subsp. Gallolyticus, subsp. Pasteurianus, Streptococcus alactolyticus	Z94012, FOLZ01000015, DQ232528, AF201899	99.35
797229	2.33168	0.000251602	Bacteria	Proteobacteria	Gammaproteobacteria	Enterobacteriales	Enterobacteriaceae	NA	NA	Escherichia coli, Escherichia fergusonii, Shigella flexneri & Shigella sonnei	LN831047, CU928158, CELV01000010, AB273732	99.14
761968	3.37194	0.000356899	Bacteria	Firmicutes	Clostridia	Clostridiales	NA	NA	NA	Bacteria;;;Firmicutes;;Clostridia;;Clostridiales;;Lachnospiraceae;;Blautia;DQ057463_s;;DQ057463	DQ057463	97.95
1076316	-3.26111	0.000372527	Bacteria	Firmicutes	Bacilli	Bacillales	Planococcaceae	NA	NA	Staphylococcus saprophyticus subsp. saprophyticus	AP008934	99.35
555945	-3.56181	0.00061536	Bacteria	Firmicutes	Clostridia	Clostridiales	Peptostreptococcaceae	NA	NA	Bacteria;;;Firmicutes;;Clostridia;;Clostridiales;;Peptostreptococcaceae;;Romboutsia;HQ768009_s;;HQ768009	HQ768009	99.32
914235	-4.76393	0.00061536	Bacteria	Actinobacteria	Actinobacteria	Actinomycetales	Brevibacteriaceae	Brevibacterium	NA	Brevibacterium iodinum, sediminis, epidermidis, celere, sanuinis, siliguriense	X76567, KX356313, BCSJ01000023, AY228463, AJ564859, AM937247	99.55
782953	2.14379	0.00137825	Bacteria	Proteobacteria	Gammaproteobacteria	Enterobacteriales	Enterobacteriaceae	NA	NA	Escherichia coli, Escherichia fergusonii, Shigella flexneri & Shigella sonnei	LN831047, CU928158, CELV01000010, AB273732	99.35
1111294	2.12264	0.00400952	Bacteria	Proteobacteria	Gammaproteobacteria	Enterobacteriales	Enterobacteriaceae	NA	NA	Escherichia coli, Escherichia fergusonii, Shigella flexneri & Shigella sonnei	LN831047, CU928158, CELV01000010, AB273732	99.14
157704	2.08654	0.00484947	Bacteria	Firmicutes	Clostridia	Clostridiales	NA	NA	NA	Bacteria;;;Firmicutes;;Clostridia;;Clostridiales;;Lachnospiraceae;;Clostridium_g7;DQ455825_s;;DQ455825	DQ455825	99.32
1088265	3.83723	0.0062361	Bacteria	Actinobacteria	Actinobacteria	Actinomycetales	Propionibacteriaceae	Propionibacterium	acnes	Cutibacterium acnes	AWZZ01000008	99.33
503354	-3.14003	0.0114172	Bacteria	Firmicutes	Bacilli	Bacillales	Planococcaceae	NA	NA	Staphylococcus arlettae	AB009933	99.35
967275	3.88995	0.0123661	Bacteria	Proteobacteria	Gammaproteobacteria	Xanthomonadales	Xanthomonadaceae	Stenotrophomonas	NA	Pseudomonas geniculata	AB021404	99.57
759751	-1.84577	0.0123661	Bacteria	Firmicutes	Clostridia	Clostridiales	NA	NA	NA	Bacteria;;;Firmicutes;;Clostridia;;Clostridiales;;Lachnospiraceae;;Clostridium_g24;EU009769_s;;EU009769	EU009769	99.32
712677	-3.10449	0.0131155	Bacteria	Firmicutes	Clostridia	Clostridiales	Clostridiaceae	SMB53	NA	Bacteria;;;Firmicutes;;Clostridia;;Clostridiales;;Peptostreptococcaceae;;Romboutsia;HQ768009_s;;HQ768009	HQ768009	99.32
536754	-3.17649	0.0141801	Bacteria	Firmicutes	Bacilli	Lactobacillales	Lactobacillaceae	Lactobacillus	NA	Lactobacillus pontis	AJ422032	98.71
237444	-3.17115	0.0141801	Bacteria	Firmicutes	Bacilli	Lactobacillales	Streptococcaceae	Streptococcus	NA	Streptococcus gallolyticus: subsp. Macedonicus, subsp. Gallolyticus, subsp. Pasteurianus, Streptococcus alactolyticus	Z94012, FOLZ01000015, DQ232528, AF201899	98.92
336703	-3.03464	0.0142272	Bacteria	Firmicutes	Bacilli	Bacillales	Staphylococcaceae	Jeotgalicoccus	NA	Jeotgalicoccus aerolatus, halophilus, nanhaiensis	GU295939, FJ386517, FJ237390	99.57
1104638	2.92838	0.0199093	Bacteria	Proteobacteria	Gammaproteobacteria	Enterobacteriales	Enterobacteriaceae	NA	NA	Escherichia coli, Escherichia fergusonii, Shigella flexneri & Shigella sonnei	LN831047, CU928158, CELV01000010, AB273732	98.71
588216	1.75039	0.0208514	Bacteria	Proteobacteria	Gammaproteobacteria	Enterobacteriales	Enterobacteriaceae	NA	NA	Escherichia coli, Escherichia fergusonii, Shigella flexneri & Shigella sonnei	LN831047, CU928158, CELV01000010, AB273732	98.92
4333897	2.003	0.0277428	Bacteria	Proteobacteria	Gammaproteobacteria	Enterobacteriales	Enterobacteriaceae	NA	NA	Escherichia coli, Escherichia fergusonii, Shigella flexneri & Shigella sonnei	LN831047, CU928158, CELV01000010, AB273732	99.35
302880	-3.14844	0.0277428	Bacteria	Firmicutes	Bacilli	Lactobacillales	Streptococcaceae	Streptococcus	NA	Streptococcus gallolyticus: subsp. Macedonicus, subsp. Gallolyticus, subsp. Pasteurianus, Streptococcus alactolyticus	Z94012, FOLZ01000015, DQ232528, AF201899	98.92
663969	-2.74716	0.0286202	Bacteria	Firmicutes	Bacilli	Lactobacillales	Leuconostocaceae	NA	NA	Weissella: hellenica, bombi	S67831, LK054487	99.57
4111715	2.15925	0.0340135	Bacteria	Proteobacteria	Gammaproteobacteria	Enterobacteriales	Enterobacteriaceae	NA	NA	Escherichia coli, Escherichia fergusonii, Shigella flexneri & Shigella sonnei	LN831047, CU928158, CELV01000010, AB273732	99.57
588197	-2.46333	0.0463227	Bacteria	Firmicutes	Bacilli	Lactobacillales	Lactobacillaceae	Lactobacillus	NA	Lactobacillus reuteri	AP007281	99.35
192832	-2.23976	0.0463227	Bacteria	Firmicutes	Bacilli	Lactobacillales	Lactobacillaceae	Lactobacillus	NA	Lactobacillus reuteri	AP007281	98.92
