# Supplementary material for: Effects of Eimeria tenella infection on chicken caecal microbiome diversity, exploring variation associated with severity of pathology
Source: PLoS One. 2017 Sep 21;12(9):e0184890. doi: 10.1371/journal.pone.0184890 (PMC5608234; doi:10.1371/journal.pone.0184890)
Supplement: S10 Table — (XLSX) [file pone.0184890.s012.xlsx]

## Sheet: S10_Table
S10 Table. Differentially abundant OTUs between uninfected samples and lesion score 4 samples.
Following classification using Greengenes (GG) database, EzBioCloud was used to further classify OTUs, species are defined by a similarity value of ≥98.65%. Accession number indicates a unique identifier for each hit.
*More than one hit and accession number indicates EzBioCloud was unable to differentiate between closely related bacterial types.
OTU ID (GG)	DeSeq2 (Padj < 0.05)		Blast against Greengenes database (Qiime)							EzBioCloud classification
	log2 Fold Change	padj	Kingdom	Phylum	Class	Order	Family	Genus	Species	Hit*	Accession*	Similarity(%)
157704	3.71411	2.21e-12	Bacteria	Firmicutes	Clostridia	Clostridiales	NA	NA	NA	Bacteria;;;Firmicutes;;Clostridia;;Clostridiales;;Lachnospiraceae;;Clostridium_g7;DQ455825_s;;DQ455825	DQ455825	99.32
173333	-6.13964	1.67e-09	Bacteria	Firmicutes	Bacilli	Bacillales	Staphylococcaceae	Staphylococcus	sciuri	Staphylococcus lentus	D83370	99.35
995960	-6.09944	4.22e-09	Bacteria	Actinobacteria	Actinobacteria	Actinomycetales	Dermabacteraceae	Brachybacterium	conglomeratum	Brachybacterium faecium or Brachybacterium paraconglomeratum	CP001643 & AJ415377	99.33
807874	-6.50067	1e-08	Bacteria	Firmicutes	Bacilli	Bacillales	Staphylococcaceae	Jeotgalicoccus	NA	Bacteria;;;Firmicutes;;Bacilli;;Bacillales;;Staphylococcaceae;;Jeotgalicoccus;GQ175333_s;;GQ175333	GQ175333	99.13
970318	-6.53604	1.31e-08	Bacteria	Firmicutes	Bacilli	Bacillales	Staphylococcaceae	Jeotgalicoccus	NA	Bacteria;;;Firmicutes;;Bacilli;;Bacillales;;Staphylococcaceae;;Jeotgalicoccus;GQ175333_s;;GQ175333	GQ175333	98.92
1104963	8.30322	2.39e-08	Bacteria	Firmicutes	Clostridia	Clostridiales	Clostridiaceae	NA	NA	Clostridium paraputrificum	X73445	98.63
967275	5.12658	6.53e-07	Bacteria	Proteobacteria	Gammaproteobacteria	Xanthomonadales	Xanthomonadaceae	Stenotrophomonas	NA	Pseudomonas geniculata	AB021404	99.57
1084865	-4.54389	1.11e-06	Bacteria	Firmicutes	Bacilli	Bacillales	NA	NA	NA	Staphylococcus xylosus	D83374	99.78
3829957	3.36744	2.06e-06	Bacteria	Proteobacteria	Gammaproteobacteria	Enterobacteriales	Enterobacteriaceae	NA	NA	Escherichia coli, Escherichia fergusonii, Shigella flexneri & Shigella sonnei	LN831047, CU928158, CELV01000010, AB273732	99.14
650615	-4.43807	4.11e-05	Bacteria	Actinobacteria	Actinobacteria	Actinomycetales	Corynebacteriaceae	Corynebacterium	NA	Corynebacterium stationis	CP009251	99.56
797229	2.18618	7.26e-05	Bacteria	Proteobacteria	Gammaproteobacteria	Enterobacteriales	Enterobacteriaceae	NA	NA	Escherichia coli, Escherichia fergusonii, Shigella flexneri & Shigella sonnei	LN831047, CU928158, CELV01000010, AB273732	99.14
422727	3.22526	8.36e-05	Bacteria	Firmicutes	Clostridia	Clostridiales	NA	NA	NA	Bacteria;;;Firmicutes;;Clostridia;;Clostridiales;;Lachnospiraceae;;Clostridium_g7;DQ455825_s;;DQ455825	DQ455825	99.32
555945	-2.86404	0.000252175	Bacteria	Firmicutes	Clostridia	Clostridiales	Peptostreptococcaceae	NA	NA	Bacteria;;;Firmicutes;;Clostridia;;Clostridiales;;Peptostreptococcaceae;;Romboutsia;HQ768009_s;;HQ768009	HQ768009	99.32
2136916	-6.55949	0.000270167	Bacteria	Lentisphaerae	[Lentisphaeria]	Victivallales	Victivallaceae	NA	NA	Victivallis vadensis	ABDE02000010	99.32
311961	2.28903	0.000288137	Bacteria	Firmicutes	Clostridia	Clostridiales	Ruminococcaceae	Anaerotruncus	NA	Anaerotruncus colihominis	ABGD02000032	99.32
914235	-5.27953	0.000715241	Bacteria	Actinobacteria	Actinobacteria	Actinomycetales	Brevibacteriaceae	Brevibacterium	NA	Brevibacterium iodinum, sediminis, epidermidis, celere, sanuinis, siliguriense	X76567, KX356313, BCSJ01000023, AY228463, AJ564859, AM937247	99.55
1111782	4.59156	0.00139181	Bacteria	Firmicutes	Clostridia	Clostridiales	Ruminococcaceae	NA	NA	Bacteria;;;Firmicutes;;Clostridia;;Clostridiales;;Ruminococcaceae;;Eubacterium_g23;AB626949_s;;AB626949	AB626949	97.95
782953	1.69784	0.00139181	Bacteria	Proteobacteria	Gammaproteobacteria	Enterobacteriales	Enterobacteriaceae	NA	NA	Escherichia coli, Escherichia fergusonii, Shigella flexneri & Shigella sonnei	LN831047, CU928158, CELV01000010, AB273732	99.35
196061	-2.32009	0.00403239	Bacteria	Firmicutes	Clostridia	Clostridiales	Ruminococcaceae	Ruminococcus	NA	Bacteria;;;Firmicutes;;Clostridia;;Clostridiales;;Ruminococcaceae;;Caproiciproducens;EU462660_s;;EU462660	EU462660	95
1076316	-2.58914	0.00695342	Bacteria	Firmicutes	Bacilli	Bacillales	Planococcaceae	NA	NA	Staphylococcus saprophyticus subsp. saprophyticus	AP008934	99.35
574528	-3.72732	0.00713727	Bacteria	Firmicutes	Clostridia	Clostridiales	Peptostreptococcaceae	NA	NA	Bacteria;;;Firmicutes;;Clostridia;;Clostridiales;;Peptostreptococcaceae;;Asaccharospora;DQ057389_s;;DQ057389	DQ057389	98.4
1111294	1.58041	0.00801946	Bacteria	Proteobacteria	Gammaproteobacteria	Enterobacteriales	Enterobacteriaceae	NA	NA	Escherichia coli, Escherichia fergusonii, Shigella flexneri & Shigella sonnei	LN831047, CU928158, CELV01000010, AB273732	99.14
237444	-3.628	0.0107752	Bacteria	Firmicutes	Bacilli	Lactobacillales	Streptococcaceae	Streptococcus	NA	Streptococcus gallolyticus: subsp. Macedonicus, subsp. Gallolyticus, subsp. Pasteurianus, Streptococcus alactolyticus	Z94012, FOLZ01000015, DQ232528, AF201899	98.92
712677	-3.54711	0.0108001	Bacteria	Firmicutes	Clostridia	Clostridiales	Clostridiaceae	SMB53	NA	Bacteria;;;Firmicutes;;Clostridia;;Clostridiales;;Peptostreptococcaceae;;Romboutsia;HQ768009_s;;HQ768009	HQ768009	99.32
587530	2.71629	0.0115889	Bacteria	Firmicutes	Erysipelotrichi	Erysipelotrichales	Erysipelotrichaceae	[Eubacterium]	dolichum	Bacteria;;;Firmicutes;;Erysipelotrichi;;Erysipelotrichales;;Erysipelotrichaceae;;Longicatena;JH590969_s;;JH590969	JH590969	99.57
229097	2.49199	0.0156605	Bacteria	Firmicutes	Clostridia	Clostridiales	Lachnospiraceae	[Ruminococcus]	NA	Bacteria;;;Firmicutes;;Clostridia;;Clostridiales;;Lachnospiraceae;;Ruminococcus_g4;EF025265_s;;EF025265	EF025265	98.86
211212	4.35586	0.0156605	Bacteria	Firmicutes	Clostridia	Clostridiales	Lachnospiraceae	NA	NA	Bacteria;;;Firmicutes;;Clostridia;;Clostridiales;;Lachnospiraceae;;AJ518873_g;EF405506_s;;EF405506	EF405506	99.32
4111715	2.20031	0.0221157	Bacteria	Proteobacteria	Gammaproteobacteria	Enterobacteriales	Enterobacteriaceae	NA	NA	Escherichia coli, Escherichia fergusonii, Shigella flexneri & Shigella sonnei	LN831047, CU928158, CELV01000010, AB273732	99.57
336703	-3.27975	0.0221157	Bacteria	Firmicutes	Bacilli	Bacillales	Staphylococcaceae	Jeotgalicoccus	NA	Jeotgalicoccus aerolatus, halophilus, nanhaiensis	GU295939, FJ386517, FJ237390	99.57
207994	4.46867	0.0221207	Bacteria	Firmicutes	Clostridia	Clostridiales	Ruminococcaceae	Ruminococcus	NA	Bacteria;;;Firmicutes;;Clostridia;;Clostridiales;;Ruminococcaceae;;Caproiciproducens;EF400739_s;;EF400739	EF400739	98.86
503354	-3.12123	0.0254795	Bacteria	Firmicutes	Bacilli	Bacillales	Planococcaceae	NA	NA	Staphylococcus arlettae	AB009933	99.35
4333897	1.74518	0.0334059	Bacteria	Proteobacteria	Gammaproteobacteria	Enterobacteriales	Enterobacteriaceae	NA	NA	Escherichia coli, Escherichia fergusonii, Shigella flexneri & Shigella sonnei	LN831047, CU928158, CELV01000010, AB273732	99.35
584137	-1.8341	0.033867	Bacteria	Firmicutes	Clostridia	Clostridiales	NA	NA	NA	Bacteria;;;Firmicutes;;Clostridia;;Clostridiales;;Lachnospiraceae;;Eisenbergiella;DQ455918_s;;DQ455918	DQ455918	98.41
761968	1.43376	0.0339092	Bacteria	Firmicutes	Clostridia	Clostridiales	NA	NA	NA	Bacteria;;;Firmicutes;;Clostridia;;Clostridiales;;Lachnospiraceae;;Blautia;DQ057463_s;;DQ057463	DQ057463	97.95
2689396	1.85658	0.0339092	Bacteria	Proteobacteria	Gammaproteobacteria	Enterobacteriales	Enterobacteriaceae	NA	NA	Escherichia coli, Escherichia fergusonii, Shigella flexneri & Shigella sonnei	LN831047, CU928158, CELV01000010, AB273732	99.35
588216	1.29511	0.0353012	Bacteria	Proteobacteria	Gammaproteobacteria	Enterobacteriales	Enterobacteriaceae	NA	NA	Escherichia coli, Escherichia fergusonii, Shigella flexneri & Shigella sonnei	LN831047, CU928158, CELV01000010, AB273732	98.92
349024	-2.24588	0.0353012	Bacteria	Firmicutes	Bacilli	Lactobacillales	Streptococcaceae	Streptococcus	NA	Streptococcus gallolyticus: subsp. Macedonicus, subsp. Gallolyticus, subsp. Pasteurianus, Streptococcus alactolyticus	Z94012, FOLZ01000015, DQ232528, AF201899	99.35
233953	2.19191	0.0364982	Bacteria	Firmicutes	Erysipelotrichi	Erysipelotrichales	Erysipelotrichaceae	Coprobacillus	NA	Bacteria;;;Firmicutes;;Erysipelotrichi;;Erysipelotrichales;;Erysipelotrichaceae;;Coprobacillus;GQ175387_s;;GQ175387	GQ175387	99.57
183362	-3.46566	0.0375218	Bacteria	Firmicutes	Clostridia	Clostridiales	Lachnospiraceae	NA	NA	Bacteria;;;Firmicutes;;Clostridia;;Clostridiales;;Lachnospiraceae;;Clostridium_g24;DQ057365_s;;DQ057365	DQ057365	98.86
583398	1.68346	0.0472628	Bacteria	Firmicutes	Clostridia	Clostridiales	Lachnospiraceae	[Ruminococcus]	NA	Bacteria;;;Firmicutes;;Clostridia;;Clostridiales;;Lachnospiraceae;;Ruminococcus_g4;GQ175403_s;;GQ175403	GQ175403	99.32
195415	2.07816	0.0475187	Bacteria	Firmicutes	Clostridia	Clostridiales	Ruminococcaceae	NA	NA	Bacteria;;;Firmicutes;;Clostridia;;Clostridiales;;Ruminococcaceae;;BBZZ_g;EF071169_s;;EF071169	EF071169	99.32
