# Supplementary material for: Effects of Eimeria tenella infection on chicken caecal microbiome diversity, exploring variation associated with severity of pathology
Source: PLoS One. 2017 Sep 21;12(9):e0184890. doi: 10.1371/journal.pone.0184890 (PMC5608234; doi:10.1371/journal.pone.0184890)
Supplement: S13 Table — (XLSX) [file pone.0184890.s015.xlsx]

## Sheet: S13_Table
S13 Table. Differentially abundant OTUs between lesion score 0 and lesion score 3 samples.
Following classification using Greengenes (GG) database, EzBioCloud was used to further classify OTUs, species are defined by a similarity value of ≥98.65%. Accession number indicates a unique identifier for each hit.
*More than one hit and accession number indicates EzBioCloud was unable to differentiate between closely related bacterial types.
OTU ID (GG)	DeSeq2 (Padj < 0.05)		Blast against Greengenes database (Qiime)							EzBioCloud classification
	log2 Fold Change	padj	Kingdom	Phylum	Class	Order	Family	Genus	Species	Hit*	Accession*	Similarity(%)
513445	11.225	1.59e-19	Bacteria	Bacteroidetes	Bacteroidia	Bacteroidales	Bacteroidaceae	Bacteroides	NA	Bacteroides vulgatus	CP000139	99.13
364029	7.88122	3e-06	Bacteria	Bacteroidetes	Bacteroidia	Bacteroidales	Bacteroidaceae	Bacteroides	NA	Bacteroides vulgatus	CP000139	98.91
157327	7.5641	3.95e-06	Bacteria	Bacteroidetes	Bacteroidia	Bacteroidales	Bacteroidaceae	Bacteroides	NA	Bacteroides vulgatus	CP000139	99.13
192832	-3.35125	6.21e-05	Bacteria	Firmicutes	Bacilli	Lactobacillales	Lactobacillaceae	Lactobacillus	NA	Lactobacillus reuteri	AP007281	98.92
577170	7.01572	0.000144678	Bacteria	Bacteroidetes	Bacteroidia	Bacteroidales	Bacteroidaceae	Bacteroides	NA	Bacteroides dorei	ABWZ01000093	97.83
1076316	-3.84015	0.000562204	Bacteria	Firmicutes	Bacilli	Bacillales	Planococcaceae	NA	NA	Staphylococcus saprophyticus subsp. saprophyticus	AP008934	99.35
536754	-4.05467	0.000935933	Bacteria	Firmicutes	Bacilli	Lactobacillales	Lactobacillaceae	Lactobacillus	NA	Lactobacillus pontis	AJ422032	98.71
376862	-4.2713	0.000935933	Bacteria	Firmicutes	Clostridia	Clostridiales	Clostridiaceae	Candidatus Arthromitus	NA	Bacteria;;;Firmicutes;;Clostridia;;Clostridiales;;Clostridiaceae;;Arthromitus;X80834_s;;X80834	X80834	99.09
1084865	-3.80222	0.00158381	Bacteria	Firmicutes	Bacilli	Bacillales	NA	NA	NA	Staphylococcus xylosus	D83374	99.78
349024	-2.88949	0.00160319	Bacteria	Firmicutes	Bacilli	Lactobacillales	Streptococcaceae	Streptococcus	NA	Streptococcus gallolyticus: subsp. Macedonicus, subsp. Gallolyticus, subsp. Pasteurianus, Streptococcus alactolyticus	Z94012, FOLZ01000015, DQ232528, AF201899	99.35
2949004	-1.56535	0.0113118	Bacteria	Firmicutes	Clostridia	Clostridiales	Lachnospiraceae	NA	NA	Bacteria;;;Firmicutes;;Clostridia;;Clostridiales;;Lachnospiraceae;;Clostridium_g24;DQ057365_s;;DQ057365	DQ057365	99.32
555945	-2.81435	0.0113118	Bacteria	Firmicutes	Clostridia	Clostridiales	Peptostreptococcaceae	NA	NA	Bacteria;;;Firmicutes;;Clostridia;;Clostridiales;;Peptostreptococcaceae;;Romboutsia;HQ768009_s;;HQ768009	HQ768009	99.32
348304	4.94468	0.0113118	Bacteria	Bacteroidetes	Bacteroidia	Bacteroidales	Bacteroidaceae	Bacteroides	NA	Bacteroides dorei	ABWZ01000093	99.35
4455163	5.0004	0.0115774	Bacteria	Bacteroidetes	Bacteroidia	Bacteroidales	Bacteroidaceae	Bacteroides	NA	Bacteroides vulgatus	CP000139	98.91
759751	-2.49892	0.0115774	Bacteria	Firmicutes	Clostridia	Clostridiales	NA	NA	NA	Bacteria;;;Firmicutes;;Clostridia;;Clostridiales;;Lachnospiraceae;;Clostridium_g24;EU009769_s;;EU009769	EU009769	99.32
588197	-3.13977	0.0128701	Bacteria	Firmicutes	Bacilli	Lactobacillales	Lactobacillaceae	Lactobacillus	NA	Lactobacillus reuteri	AP007281	99.35
3940440	5.24523	0.0160429	Bacteria	Bacteroidetes	Bacteroidia	Bacteroidales	Bacteroidaceae	Bacteroides	NA	Bacteroides vulgatus	CP000139	99.13
188887	5.07111	0.0177933	Bacteria	Bacteroidetes	Bacteroidia	Bacteroidales	Bacteroidaceae	Bacteroides	NA	Bacteroides vulgatus	CP000139	98.7
766768	-2.59554	0.0211342	Bacteria	Firmicutes	Bacilli	Lactobacillales	Enterococcaceae	Enterococcus	NA	Enterococcus ratti, hirae, durans, faecium, villorum, rivorum	JXLB01000051, CP003504, BCQB01000108, AJKH01000109, AJAN01000023, FN822765	99.35
4416659	-2.93634	0.0238842	Bacteria	Firmicutes	Bacilli	Lactobacillales	Lactobacillaceae	Lactobacillus	NA	Lactobacillus reuteri	AP007281	99.14
197874	-1.60016	0.0291752	Bacteria	Firmicutes	Clostridia	Clostridiales	Ruminococcaceae	NA	NA	Bacteria;;;Firmicutes;;Clostridia;;Clostridiales;;Ruminococcaceae;;Agathobaculum;EF071402_s;;EF071402	EF071402	99.09
205904	5.11431	0.0303411	Bacteria	Bacteroidetes	Bacteroidia	Bacteroidales	Bacteroidaceae	Bacteroides	NA	Bacteroides vulgatus	CP000139	98.91
189384	4.61835	0.0333191	Bacteria	Bacteroidetes	Bacteroidia	Bacteroidales	Bacteroidaceae	Bacteroides	NA	Bacteroides vulgatus	CP000139	98.7
589277	4.46729	0.0364134	Bacteria	Bacteroidetes	Bacteroidia	Bacteroidales	Bacteroidaceae	Bacteroides	NA	Bacteroides dorei	ABWZ01000093	97.83
958496	-3.88835	0.041332	Bacteria	Firmicutes	Bacilli	Lactobacillales	Lactobacillaceae	Lactobacillus	NA	Lactobacillus gallinarum, crispatus	BALB01000057, AZCW01000112	99.14
