# Supplementary material for: Effects of Eimeria tenella infection on chicken caecal microbiome diversity, exploring variation associated with severity of pathology
Source: PLoS One. 2017 Sep 21;12(9):e0184890. doi: 10.1371/journal.pone.0184890 (PMC5608234; doi:10.1371/journal.pone.0184890)
Supplement: S14 Table — (XLSX) [file pone.0184890.s016.xlsx]

## Sheet: S14_Table
S14 Table. Differentially abundant OTUs between lesion score 0 and lesion score 4 samples.
Following classification using Greengenes (GG) database, EzBioCloud was used to further classify OTUs, species are defined by a similarity value of ≥98.65%. Accession number indicates a unique identifier for each hit.
*More than one hit and accession number indicates EzBioCloud was unable to differentiate between closely related bacterial types.
OTU ID (GG)	DeSeq2 (Padj < 0.05)		Blast against Greengenes database (Qiime)							EzBioCloud classification
	log2FoldChange	padj	Kingdom	Phylum	Class	Order	Family	Genus	Species	Hit*	Accession*	Similarity(%)
513445	9.09504	5.17e-17	Bacteria	Bacteroidetes	Bacteroidia	Bacteroidales	Bacteroidaceae	Bacteroides	NA	Bacteroides vulgatus	CP000139	99.13
157704	2.68611	1.31e-08	Bacteria	Firmicutes	Clostridia	Clostridiales	NA	NA	NA	Bacteria;;;Firmicutes;;Clostridia;;Clostridiales;;Lachnospiraceae;;Clostridium_g7;DQ455825_s;;DQ455825	DQ455825	99.32
221429	-3.28557	3.94e-06	Bacteria	Firmicutes	Clostridia	Clostridiales	Ruminococcaceae	NA	NA	Bacteria;;;Firmicutes;;Clostridia;;Clostridiales;;Ruminococcaceae;;AB491207_g;EF434337_s;;EF434337	EF434337	99.09
196061	-2.05468	1.81e-05	Bacteria	Firmicutes	Clostridia	Clostridiales	Ruminococcaceae	Ruminococcus	NA	Bacteria;;;Firmicutes;;Clostridia;;Clostridiales;;Ruminococcaceae;;Caproiciproducens;EU462660_s;;EU462660	EU462660	95
364029	5.75365	1.88e-05	Bacteria	Bacteroidetes	Bacteroidia	Bacteroidales	Bacteroidaceae	Bacteroides	NA	Bacteroides vulgatus	CP000139	98.91
1084865	-4.68617	1.88e-05	Bacteria	Firmicutes	Bacilli	Bacillales	NA	NA	NA	Staphylococcus xylosus	D83374	99.78
157327	5.41712	0.000325496	Bacteria	Bacteroidetes	Bacteroidia	Bacteroidales	Bacteroidaceae	Bacteroides	NA	Bacteroides vulgatus	CP000139	99.13
967275	3.39247	0.000362933	Bacteria	Proteobacteria	Gammaproteobacteria	Xanthomonadales	Xanthomonadaceae	Stenotrophomonas	NA	Pseudomonas geniculata	AB021404	99.57
1137031	-5.42388	0.000362933	Bacteria	Firmicutes	Bacilli	Lactobacillales	Lactobacillaceae	Pediococcus	acidilactici	Pediococcus acidilactici, lolii	GL397069, BANK01000051	99.78
1076316	-3.20259	0.000625764	Bacteria	Firmicutes	Bacilli	Bacillales	Planococcaceae	NA	NA	Staphylococcus saprophyticus subsp. saprophyticus	AP008934	99.35
422727	2.17767	0.000684994	Bacteria	Firmicutes	Clostridia	Clostridiales	NA	NA	NA	Bacteria;;;Firmicutes;;Clostridia;;Clostridiales;;Lachnospiraceae;;Clostridium_g7;DQ455825_s;;DQ455825	DQ455825	99.32
197874	-1.5903	0.000738236	Bacteria	Firmicutes	Clostridia	Clostridiales	Ruminococcaceae	NA	NA	Bacteria;;;Firmicutes;;Clostridia;;Clostridiales;;Ruminococcaceae;;Agathobaculum;EF071402_s;;EF071402	EF071402	99.09
580521	-1.40067	0.000854514	Bacteria	Firmicutes	Clostridia	Clostridiales	Ruminococcaceae	NA	NA	Bacteria;;;Firmicutes;;Clostridia;;Clostridiales;;Ruminococcaceae;;Agathobaculum;EF071402_s;;EF071402	EF071402	99.32
555945	-2.24316	0.00433038	Bacteria	Firmicutes	Clostridia	Clostridiales	Peptostreptococcaceae	NA	NA	Bacteria;;;Firmicutes;;Clostridia;;Clostridiales;;Peptostreptococcaceae;;Romboutsia;HQ768009_s;;HQ768009	HQ768009	99.32
592913	3.16389	0.00586268	Bacteria	Firmicutes	Clostridia	Clostridiales	NA	NA	NA	Bacteria;;;Firmicutes;;Clostridia;;Clostridiales;;Christensenellaceae;;HM124260_g;DQ456434_s;;DQ456434	DQ456434	97.97
577170	4.89592	0.00707965	Bacteria	Bacteroidetes	Bacteroidia	Bacteroidales	Bacteroidaceae	Bacteroides	NA	Bacteroides dorei	ABWZ01000093	97.83
361683	-1.43479	0.00707965	Bacteria	Firmicutes	Clostridia	Clostridiales	Ruminococcaceae	NA	NA	Bacteria;;;Firmicutes;;Clostridia;;Clostridiales;;Ruminococcaceae;;Agathobaculum;EF071402_s;;EF071402	EF071402	99.54
185391	-2.34065	0.0114262	Bacteria	Firmicutes	Clostridia	Clostridiales	Ruminococcaceae	NA	NA	Bacteria;;;Firmicutes;;Clostridia;;Clostridiales;;Ruminococcaceae;;Agathobaculum;EF071402_s;;EF071402	EF071402	99.1
681370	-3.57621	0.015878	Bacteria	Actinobacteria	Actinobacteria	Bifidobacteriales	Bifidobacteriaceae	Bifidobacterium	pseudolongum	Bifidobacterium pseudolongum subsp. globosum	JHWN01000028	99.12
192832	-2.63324	0.0164514	Bacteria	Firmicutes	Bacilli	Lactobacillales	Lactobacillaceae	Lactobacillus	NA	Lactobacillus reuteri	AP007281	98.92
583398	1.45265	0.0171366	Bacteria	Firmicutes	Clostridia	Clostridiales	Lachnospiraceae	[Ruminococcus]	NA	Bacteria;;;Firmicutes;;Clostridia;;Clostridiales;;Lachnospiraceae;;Ruminococcus_g4;GQ175403_s;;GQ175403	GQ175403	99.32
1104963	4.16107	0.0171366	Bacteria	Firmicutes	Clostridia	Clostridiales	Clostridiaceae	NA	NA	Clostridium paraputrificum	X73445	98.63
563086	1.05756	0.0227795	Bacteria	Firmicutes	Clostridia	Clostridiales	Lachnospiraceae	[Ruminococcus]	NA	Bacteria;;;Firmicutes;;Clostridia;;Clostridiales;;Lachnospiraceae;;Ruminococcus_g4;GQ175403_s;;GQ175403	GQ175403	99.09
229097	2.14031	0.0266027	Bacteria	Firmicutes	Clostridia	Clostridiales	Lachnospiraceae	[Ruminococcus]	NA	Bacteria;;;Firmicutes;;Clostridia;;Clostridiales;;Lachnospiraceae;;Ruminococcus_g4;EF025265_s;;EF025265	EF025265	98.86
376862	-2.93089	0.0266027	Bacteria	Firmicutes	Clostridia	Clostridiales	Clostridiaceae	Candidatus Arthromitus	NA	Bacteria;;;Firmicutes;;Clostridia;;Clostridiales;;Clostridiaceae;;Arthromitus;X80834_s;;X80834	X80834	99.09
311961	1.5995	0.0279524	Bacteria	Firmicutes	Clostridia	Clostridiales	Ruminococcaceae	Anaerotruncus	NA	Anaerotruncus colihominis	ABGD02000032	99.32
348304	3.76405	0.0301726	Bacteria	Bacteroidetes	Bacteroidia	Bacteroidales	Bacteroidaceae	Bacteroides	NA	Bacteroides dorei	ABWZ01000093	99.35
360703	2.15592	0.0319514	Bacteria	Firmicutes	Clostridia	Clostridiales	Lachnospiraceae	[Ruminococcus]	NA	Bacteria;;;Firmicutes;;Clostridia;;Clostridiales;;Lachnospiraceae;;Ruminococcus_g4;DQ071536_s;;DQ071536	DQ071536	98.86
156357	-2.04194	0.0407321	Bacteria	Firmicutes	Clostridia	Clostridiales	Lachnospiraceae	Clostridium	NA	Clostridium colinum	X76748	97.97
712677	-3.32994	0.0442973	Bacteria	Firmicutes	Clostridia	Clostridiales	Clostridiaceae	SMB53	NA	Bacteria;;;Firmicutes;;Clostridia;;Clostridiales;;Peptostreptococcaceae;;Romboutsia;HQ768009_s;;HQ768009	HQ768009	99.32
237444	-2.82378	0.0442973	Bacteria	Firmicutes	Bacilli	Lactobacillales	Streptococcaceae	Streptococcus	NA	Streptococcus gallolyticus: subsp. Macedonicus, subsp. Gallolyticus, subsp. Pasteurianus, Streptococcus alactolyticus	Z94012, FOLZ01000015, DQ232528, AF201899	98.92
4426298	-2.9439	0.0470872	Bacteria	Actinobacteria	Actinobacteria	Bifidobacteriales	Bifidobacteriaceae	Bifidobacterium	NA	Bifidobacterium animalis subsp. lactis	CP001606	99.34
