# Supplementary material for: Effects of Eimeria tenella infection on chicken caecal microbiome diversity, exploring variation associated with severity of pathology
Source: PLoS One. 2017 Sep 21;12(9):e0184890. doi: 10.1371/journal.pone.0184890 (PMC5608234; doi:10.1371/journal.pone.0184890)
Supplement: S16 Table — (XLSX) [file pone.0184890.s018.xlsx]

## Sheet: S16_Table
S16 Table. Differentially abundant OTUs between lesion score 1 and lesion score 4 samples.
Following classification using Greengenes (GG) database, EzBioCloud was used to further classify OTUs, species are definned by a similarity value of ≥98.65%. Accession number indicates a unique identifier for each hit.
*More than one hit and accession number indicates EzBioCloud was unable to differentiate between closely related bacterial types.
OTU ID (GG)	DeSeq2 (Padj < 0.05)		Blast against Greengenes database (Qiime)							EzBioCloud classification
	log2 Fold Change	padj	Kingdom	Phylum	Class	Order	Family	Genus	Species	Hit*	Accession*	Similarity(%)
157704	2.08436	4.89624e-08	Bacteria	Firmicutes	Clostridia	Clostridiales	NA	NA	NA	Bacteria;;;Firmicutes;;Clostridia;;Clostridiales;;Lachnospiraceae;;Clostridium_g7;DQ455825_s;;DQ455825	DQ455825	99.32
157957	-1.83629	0.00142332	Bacteria	Firmicutes	Clostridia	Clostridiales	NA	NA	NA	Bacteria;;;Firmicutes;;Clostridia;;Clostridiales;;Lachnospiraceae;;Eisenbergiella;DQ455918_s;;DQ455918	DQ455918	98.41
422727	1.9858	0.00459356	Bacteria	Firmicutes	Clostridia	Clostridiales	NA	NA	NA	Bacteria;;;Firmicutes;;Clostridia;;Clostridiales;;Lachnospiraceae;;Clostridium_g7;DQ455825_s;;DQ455825	DQ455825	99.32
229097	2.40098	0.0199158	Bacteria	Firmicutes	Clostridia	Clostridiales	Lachnospiraceae	[Ruminococcus]	NA	Bacteria;;;Firmicutes;;Clostridia;;Clostridiales;;Lachnospiraceae;;Ruminococcus_g4;EF025265_s;;EF025265	EF025265	98.86
584137	-1.66202	0.0199158	Bacteria	Firmicutes	Clostridia	Clostridiales	NA	NA	NA	Bacteria;;;Firmicutes;;Clostridia;;Clostridiales;;Lachnospiraceae;;Eisenbergiella;DQ455918_s;;DQ455918	DQ455918	98.41
967275	2.48379	0.0199158	Bacteria	Proteobacteria	Gammaproteobacteria	Xanthomonadales	Xanthomonadaceae	Stenotrophomonas	NA	Pseudomonas geniculata	AB021404	99.57
583398	1.49216	0.0231726	Bacteria	Firmicutes	Clostridia	Clostridiales	Lachnospiraceae	[Ruminococcus]	NA	Bacteria;;;Firmicutes;;Clostridia;;Clostridiales;;Lachnospiraceae;;Eisenbergiella;DQ455918_s;;DQ455918	DQ455918	98.41
221429	-2.15373	0.0278881	Bacteria	Firmicutes	Clostridia	Clostridiales	Ruminococcaceae	NA	NA	Bacteria;;;Firmicutes;;Clostridia;;Clostridiales;;Ruminococcaceae;;AB491207_g;EF434337_s;;EF434337	EF434337	99.09
3409355	-2.41046	0.0382341	Bacteria	Firmicutes	Clostridia	Clostridiales	NA	NA	NA	Bacteria;;;Firmicutes;;Clostridia;;Clostridiales;;Lachnospiraceae;;Eisenbergiella;DQ455918_s;;DQ455918	DQ455918	98.64
1084865	-3.17731	0.0463663	Bacteria	Firmicutes	Bacilli	Bacillales	NA	NA	NA	Staphylococcus xylosus	D83374	99.78
