# Supplementary material for: Effects of Eimeria tenella infection on chicken caecal microbiome diversity, exploring variation associated with severity of pathology
Source: PLoS One. 2017 Sep 21;12(9):e0184890. doi: 10.1371/journal.pone.0184890 (PMC5608234; doi:10.1371/journal.pone.0184890)
Supplement: S18 Table — (XLSX) [file pone.0184890.s020.xlsx]

## Sheet: S18_Table
S18 Table. Differentially abundant OTUs between lesion score 0 and lesion score 1-4, symptomatic samples.
Following classification using Greengenes (GG) database, EzBioCloud was used to further classify OTUs, species are definned by a similarity value of ≥98.65%. Accession number indicates a unique identifier for each hit.
*More than one hit and accession number indicates EzBioCloud was unable to differentiate between closely related bacterial types.
OTU ID (GG)	DeSeq2 (Padj < 0.05)		Blast against Greengenes database (Qiime)							EzBioCloud classification
	log2 Fold Change	padj	Kingdom	Phylum	Class	Order	Family	Genus	Species	Hit*	Accession*	Similarity(%)
513445	8.62224	2.76e-14	Bacteria	Bacteroidetes	Bacteroidia	Bacteroidales	Bacteroidaceae	Bacteroides	NA	Bacteroides vulgatus	CP000139	99.13
364029	5.80626	0.000165113	Bacteria	Bacteroidetes	Bacteroidia	Bacteroidales	Bacteroidaceae	Bacteroides	NA	Bacteroides vulgatus	CP000139	98.91
157327	5.53326	0.000399057	Bacteria	Bacteroidetes	Bacteroidia	Bacteroidales	Bacteroidaceae	Bacteroides	NA	Bacteroides vulgatus	CP000139	99.13
813944	-4.05389	0.0014088	Bacteria	Firmicutes	Bacilli	Lactobacillales	Lactobacillaceae	Lactobacillus	NA	Lactobacillus gallinarum, crispatus	BALB01000057, AZCW01000112	99.57
586093	-3.78761	0.0023827	Bacteria	Firmicutes	Bacilli	Lactobacillales	Lactobacillaceae	Lactobacillus	NA	Lactobacillus gallinarum, crispatus	BALB01000057, AZCW01000112	98.28
577170	4.68747	0.0123744	Bacteria	Bacteroidetes	Bacteroidia	Bacteroidales	Bacteroidaceae	Bacteroides	NA	Bacteroides dorei	ABWZ01000093	97.83
584571	-3.57869	0.0123744	Bacteria	Firmicutes	Bacilli	Lactobacillales	Lactobacillaceae	Lactobacillus	NA	Lactobacillus gallinarum, crispatus	BALB01000057, AZCW01000112	98.06
348304	4.06396	0.0149604	Bacteria	Bacteroidetes	Bacteroidia	Bacteroidales	Bacteroidaceae	Bacteroides	NA	Bacteroides dorei	ABWZ01000093	99.35
1076316	-2.36391	0.0149604	Bacteria	Firmicutes	Bacilli	Bacillales	Planococcaceae	NA	NA	Staphylococcus saprophyticus subsp. saprophyticus	AP008934	99.35
192832	-2.34572	0.0149604	Bacteria	Firmicutes	Bacilli	Lactobacillales	Lactobacillaceae	Lactobacillus	NA	Lactobacillus reuteri	AP007281	98.92
958496	-3.50988	0.0151681	Bacteria	Firmicutes	Bacilli	Lactobacillales	Lactobacillaceae	Lactobacillus	NA	Lactobacillus gallinarum, crispatus	BALB01000057, AZCW01000112	99.14
681370	-3.14969	0.0154074	Bacteria	Actinobacteria	Actinobacteria	Bifidobacteriales	Bifidobacteriaceae	Bifidobacterium	pseudolongum	Bifidobacterium pseudolongum subsp. Globosum, subsp. Pseudolongum	JHWN01000028, JGZH01000003	99.12
188887	4.04729	0.0247311	Bacteria	Bacteroidetes	Bacteroidia	Bacteroidales	Bacteroidaceae	Bacteroides	NA	Bacteroides vulgatus	CP000139	98.7
205904	4.09734	0.0293321	Bacteria	Bacteroidetes	Bacteroidia	Bacteroidales	Bacteroidaceae	Bacteroides	NA	Bacteroides vulgatus	CP000139	98.91
3940440	3.98723	0.0392739	Bacteria	Bacteroidetes	Bacteroidia	Bacteroidales	Bacteroidaceae	Bacteroides	NA	Bacteroides vulgatus	CP000139	99.13
463361	-3.17427	0.0392739	Bacteria	Firmicutes	Bacilli	Lactobacillales	Lactobacillaceae	Lactobacillus	NA	Lactobacillus amylovorus, ultunensis	AZCM01000082, ACGU01000081	99.57
